# Supplementary material for: Adiposity and the isotemporal substitution of physical activity, sedentary time and sleep among school-aged children: a compositional data analysis approach
Source: Springer Nature journal article supplement (doi:10.1186/s12889-018-5207-1), 2018-03-02
Supplement: MOESM2 [file 15503968]

Supplementary file 2: Characteristics of Included and Excluded Participants

Table 1: Included and excluded participant characteristics

| Characteristic                                        |                      | Included<br>( <i>n</i> = 1728) | Excluded<br>( <i>n</i> = 428) | <i>p</i> *                                   |
|-------------------------------------------------------|----------------------|--------------------------------|-------------------------------|----------------------------------------------|
| Sex                                                   | Male                 | 760 (44%)                      | 212 (50%)                     | <b>0.018</b>                                 |
|                                                       | Female               | 968 (56%)                      | 216 (50%)                     |                                              |
| Number of siblings                                    | 0                    | 187 (11%)                      | 31 (7%)                       | <b>&lt;0.001</b>                             |
|                                                       | 1                    | 795 (46%)                      | 124 (29%)                     |                                              |
|                                                       | 2                    | 447(26%)                       | 97 (23%)                      |                                              |
|                                                       | 3                    | 183 (11%)                      | 45 (11%)                      |                                              |
|                                                       | ≥4                   | 116 (7%)                       | 131 (31%)                     |                                              |
| Number of parents                                     | 0-1                  | 299 (17%)                      | 78 (18%)                      | 0.653                                        |
|                                                       | ≥2                   | 1429 (83%)                     | 350 (82%)                     |                                              |
| Highest parental education level                      | Level 1 <sup>S</sup> | 81 (5%)                        | 17 (5%)                       | <i>n</i> <sup>#</sup> = 316 <b>0.043</b>     |
|                                                       | Level 2              | 751 (43%)                      | 167 (53%)                     |                                              |
|                                                       | Level 3              | 896 (52%)                      | 132 (42%)                     |                                              |
| Activity behaviours;<br>Compositional mean<br>(min/d) | Sleep                | 558                            | 552                           | <i>n</i> <sup>#</sup> = 109 <b>&lt;0.001</b> |
|                                                       | SED                  | 516                            | 539                           |                                              |
|                                                       | LPA                  | 304                            | 294                           |                                              |
|                                                       | MVPA                 | 62                             | 55                            |                                              |
| Body fat%; Mean (SD)                                  |                      | 20.45 (7.11)                   | 20.88 (7.63)                  | <i>n</i> <sup>#</sup> = 394 0.270            |

Abbreviations: SED, sedentary time; LPA, light physical activity; MVPA, moderate-to-vigorous physical activity. To test for difference between groups: chi squared was used for categorical data and t-test for continuous data. MANOVA was used for isometric log ratio-transformed compositional time use data. \*Bold *P* values indicate statistical significant difference at alpha < 0.05 <sup>S</sup>Parent education levels are: 1 = less than high school or some high school; 2 = completed high school or some post-secondary (e.g. vocational diploma or certificate); 3 = bachelor degree or post-graduate. <sup>#</sup>number of excluded participants with complete data for relevant covariate
