# Supplementary material for: Adiposity and the isotemporal substitution of physical activity, sedentary time and sleep among school-aged children: a compositional data analysis approach
Source: Springer Nature journal article supplement (doi:10.1186/s12889-018-5207-1), 2018-03-02
Supplement: MOESM3 [file 15503968]

Supplementary File 3

Table 1: Mean Daily Behaviour Composition Across zBMI Categories.

| <b>BOYS</b>                      |          |                            |                          |                          |                           |
|----------------------------------|----------|----------------------------|--------------------------|--------------------------|---------------------------|
|                                  | <i>n</i> | <b>Sleep<br/>(min/day)</b> | <b>SED<br/>(min/day)</b> | <b>LPA<br/>(min/day)</b> | <b>MVPA<br/>(min/day)</b> |
| <b>Overall</b>                   | 760      | 550                        | 510                      | 308                      | 72                        |
| <b>Normal weight<sup>a</sup></b> | 520      | 551                        | 506                      | 307                      | 75                        |
| <b>Overweight</b>                | 158      | 549                        | 515                      | 307                      | 70                        |
| <b>Obese</b>                     | 79       | 541                        | 526                      | 313                      | 61                        |
| <b>GIRLS</b>                     |          |                            |                          |                          |                           |
|                                  | <i>n</i> | <b>Sleep<br/>(min/day)</b> | <b>SED<br/>(min/day)</b> | <b>LPA<br/>(min/day)</b> | <b>MVPA<br/>(min/day)</b> |
| <b>Overall</b>                   | 968      | 564                        | 520                      | 301                      | 55                        |
| <b>Normal<sup>a</sup> weight</b> | 672      | 567                        | 515                      | 301                      | 57                        |
| <b>Overweight</b>                | 207      | 562                        | 526                      | 298                      | 54                        |
| <b>Obese</b>                     | 78       | 543                        | 545                      | 307                      | 45                        |

Abbreviations: SED, sedentary time; LPA, light physical activity; MVPA, moderate-to-vigorous physical activity. Mean values correspond to geometric adjusted to collectively sum 1440 minutes, however due to rounding daily averages presented do not always add to 1440. Weight-status subgroups derived from World Health Organization classification of body mass index z-scores. <sup>a</sup>Mean composition for severe thinness/thinness (WHO z-score  $\leq 2$ ) ( $n= 14$ ) subgroups not presented.

N.B.: No standard deviations are provided, as they are inadequate to describe the multi-variate dispersion of compositional data. Refer to variation matrices below.

Table 2: Variation Matrices of Daily Activity Behaviour Components

|       | <b>BOYS: All (n=760)</b> |            |            |             | <b>GIRLS: All (n=968)</b> |            |            |             |
|-------|--------------------------|------------|------------|-------------|---------------------------|------------|------------|-------------|
|       | <b>Sleep</b>             | <b>SED</b> | <b>LPA</b> | <b>MVPA</b> | <b>Sleep</b>              | <b>SED</b> | <b>LPA</b> | <b>MVPA</b> |
| Sleep | 0.00                     | 0.04       | 0.04       | 0.13        | 0.00                      | 0.03       | 0.04       | 0.11        |
| SED   | 0.04                     | 0.00       | 0.07       | 0.18        | 0.03                      | 0.00       | 0.06       | 0.15        |
| LPA   | 0.04                     | 0.07       | 0.00       | 0.09        | 0.04                      | 0.06       | 0.00       | 0.10        |
| MVPA  | 0.13                     | 0.18       | 0.09       | 0.00        | 0.11                      | 0.15       | 0.10       | 0.00        |

  

|       | <b>BOYS: Normal Weight (n=520)</b> |            |            |             | <b>GIRLS: Normal Weight (n=672)</b> |            |            |             |
|-------|------------------------------------|------------|------------|-------------|-------------------------------------|------------|------------|-------------|
|       | <b>Sleep</b>                       | <b>SED</b> | <b>LPA</b> | <b>MVPA</b> | <b>Sleep</b>                        | <b>SED</b> | <b>LPA</b> | <b>MVPA</b> |
| Sleep | 0.00                               | 0.03       | 0.04       | 0.12        | 0.00                                | 0.03       | 0.03       | 0.12        |
| SED   | 0.03                               | 0.00       | 0.07       | 0.16        | 0.03                                | 0.00       | 0.06       | 0.16        |
| LPA   | 0.04                               | 0.07       | 0.00       | 0.08        | 0.03                                | 0.06       | 0.00       | 0.09        |
| MVPA  | 0.12                               | 0.16       | 0.08       | 0.00        | 0.12                                | 0.16       | 0.09       | 0.00        |

  

|       | <b>BOYS: Overweight (n=158)</b> |            |            |             | <b>GIRLS: Overweight (n=207)</b> |            |            |             |
|-------|---------------------------------|------------|------------|-------------|----------------------------------|------------|------------|-------------|
|       | <b>Sleep</b>                    | <b>SED</b> | <b>LPA</b> | <b>MVPA</b> | <b>Sleep</b>                     | <b>SED</b> | <b>LPA</b> | <b>MVPA</b> |
| Sleep | 0.00                            | 0.04       | 0.03       | 0.16        | 0.00                             | 0.04       | 0.05       | 0.13        |
| SED   | 0.04                            | 0.00       | 0.07       | 0.19        | 0.04                             | 0.00       | 0.07       | 0.12        |
| LPA   | 0.03                            | 0.07       | 0.00       | 0.10        | 0.05                             | 0.07       | 0.00       | 0.10        |
| MVPA  | 0.16                            | 0.19       | 0.10       | 0.00        | 0.13                             | 0.12       | 0.10       | 0.00        |

  

|       | <b>BOYS: Obese (n=79)</b> |            |            |             | <b>GIRLS: Obese (n=78)</b> |            |            |             |
|-------|---------------------------|------------|------------|-------------|----------------------------|------------|------------|-------------|
|       | <b>Sleep</b>              | <b>SED</b> | <b>LPA</b> | <b>MVPA</b> | <b>Sleep</b>               | <b>SED</b> | <b>LPA</b> | <b>MVPA</b> |
| Sleep | 0.00                      | 0.03       | 0.04       | 0.11        | 0.00                       | 0.05       | 0.04       | 0.11        |
| SED   | 0.03                      | 0.00       | 0.05       | 0.20        | 0.05                       | 0.00       | 0.06       | 0.15        |
| LPA   | 0.04                      | 0.05       | 0.00       | 0.12        | 0.04                       | 0.06       | 0.00       | 0.09        |
| MVPA  | 0.11                      | 0.20       | 0.12       | 0.00        | 0.11                       | 0.15       | 0.09       | 0.00        |

SED, sedentary time; LPA, light physical activity; MVPA, moderate-to-vigorous physical activity. Weight-status subgroups derived from World Health Organization classification of body mass index z-scores. “Severe thinness” and “thinness” weight status categories (n=14) not presented.
