# Supplementary material for: Adiposity and the isotemporal substitution of physical activity, sedentary time and sleep among school-aged children: a compositional data analysis approach
Source: Springer Nature journal article supplement (doi:10.1186/s12889-018-5207-1), 2018-03-02
Supplement: MOESM4 [file 15503968]

**Supplementary File 4: Compositional Isotemporal Substitution at Weight Status Subgroups**

Table 1. Boys: Estimated difference in body fat% associated with the pair-wise reallocation of 30 minutes between behaviours.

| <b>Normal Weight <i>n</i> = 520</b> |              |               |            |               |            |               |             |               |
|-------------------------------------|--------------|---------------|------------|---------------|------------|---------------|-------------|---------------|
|                                     | <b>Sleep</b> |               | <b>SED</b> |               | <b>LPA</b> |               | <b>MVPA</b> |               |
|                                     | $\Delta'$    | <b>95% CI</b> | $\Delta'$  | <b>95% CI</b> | $\Delta'$  | <b>95% CI</b> | $\Delta'$   | <b>95% CI</b> |
| <b>Sleep</b>                        |              |               | -0.21      | -0.46, 0.05   | -0.53      | -0.87, -0.18  | 2.00        | 1.30, 2.71    |
| <b>SED</b>                          | 0.21         | -0.05, 0.46   |            |               | -0.33      | -0.64, -0.02  | 2.20        | 1.55, 2.85    |
| <b>LPA</b>                          | 0.49         | 0.16, 0.83    | 0.28       | -0.01, 0.57   |            |               | 2.49        | 1.70, 3.28    |
| <b>MVPA</b>                         | -1.28        | -1.77, -0.79  | -1.49      | -1.93, -1.06  | -1.81      | -2.40, -1.22  |             |               |
| <b>Overweight <i>n</i> = 158</b>    |              |               |            |               |            |               |             |               |
|                                     | <b>Sleep</b> |               | <b>SED</b> |               | <b>LPA</b> |               | <b>MVPA</b> |               |
|                                     | $\Delta'$    | <b>95% CI</b> | $\Delta'$  | <b>95% CI</b> | $\Delta'$  | <b>95% CI</b> | $\Delta'$   | <b>95% CI</b> |
| <b>Sleep</b>                        |              |               | -0.20      | -0.46, 0.05   | -0.53      | -0.88, -0.18  | 2.22        | 1.45, 2.99    |
| <b>SED</b>                          | 0.20         | -0.05, 0.46   |            |               | -0.33      | -0.64, -0.02  | 2.42        | 1.70, 3.14    |
| <b>LPA</b>                          | 0.49         | 0.16, 0.83    | 0.28       | -0.01, 0.57   |            |               | 2.71        | 1.85, 3.56    |
| <b>MVPA</b>                         | -1.37        | -1.89, -0.85  | -1.58      | -2.04, -1.12  | -1.90      | -2.52, -1.29  |             |               |
| <b>Obese <i>n</i> = 79</b>          |              |               |            |               |            |               |             |               |
|                                     | <b>Sleep</b> |               | <b>SED</b> |               | <b>LPA</b> |               | <b>MVPA</b> |               |
|                                     | $\Delta'$    | <b>95% CI</b> | $\Delta'$  | <b>95% CI</b> | $\Delta'$  | <b>95% CI</b> | $\Delta'$   | <b>95% CI</b> |
| <b>Sleep</b>                        |              |               | -0.20      | -0.46, 0.05   | -0.52      | -0.87, -0.18  | 2.71        | 1.78, 3.64    |
| <b>SED</b>                          | 0.20         | -0.05, 0.46   |            |               | -0.32      | -0.62, -0.02  | 2.91        | 2.03, 3.78    |
| <b>LPA</b>                          | 0.49         | 0.16, 0.82    | 0.28       | -0.01, 0.56   |            |               | 3.19        | 2.19, 4.19    |
| <b>MVPA</b>                         | -1.55        | -2.13, -0.98  | -1.76      | -2.28, -1.24  | -2.08      | -2.74, -1.41  |             |               |

Abbreviations:  $\Delta'$ , estimated change in body fat%; CI, confidence interval; SED, sedentary time; LPA, light physical activity; MVPA, moderate-to-vigorous physical activity. Severe thinness and thinness weight status categories ( $n=3$ ) not presented. Note: Difference in body fat% is estimated for the reallocation of time from the behaviour in the column to the behaviour in the row, i.e., the first value of -0.21 in Row 1 is the estimated difference in body fat% for the reallocation of 30 minutes from sedentary time to sleep. Analysis adjusted for parental education level and number of parents and siblings.

Table 2. Girls: Estimated difference in body fat% associated with the pair-wise reallocation of 30 minutes between behaviours.

| <b>Normal Weight <i>n</i> = 672</b> |              |               |            |               |            |               |             |               |
|-------------------------------------|--------------|---------------|------------|---------------|------------|---------------|-------------|---------------|
|                                     | <b>Sleep</b> |               | <b>SED</b> |               | <b>LPA</b> |               | <b>MVPA</b> |               |
|                                     | $\Delta'$    | <b>95% CI</b> | $\Delta'$  | <b>95% CI</b> | $\Delta'$  | <b>95% CI</b> | $\Delta'$   | <b>95% CI</b> |
| <b>Sleep</b>                        |              |               | -0.52      | -0.80, -0.24  | -0.49      | -0.85, -0.12  | 2.33        | 1.27, 3.38    |
| <b>SED</b>                          | 0.52         | 0.24, 0.80    |            |               | 0.02       | -0.30, 0.34   | 2.83        | 1.82, 3.84    |
| <b>LPA</b>                          | 0.47         | 0.13, 0.82    | -0.06      | -0.37, 0.24   |            |               | 2.79        | 1.63, 3.94    |
| <b>MVPA</b>                         | -1.21        | -1.83, -0.59  | -1.74      | -2.32, -1.17  | -1.71      | -2.45, -0.97  |             |               |
| <b>Overweight <i>n</i> = 207</b>    |              |               |            |               |            |               |             |               |
|                                     | <b>Sleep</b> |               | <b>SED</b> |               | <b>LPA</b> |               | <b>MVPA</b> |               |
|                                     | $\Delta'$    | <b>95% CI</b> | $\Delta'$  | <b>95% CI</b> | $\Delta'$  | <b>95% CI</b> | $\Delta'$   | <b>95% CI</b> |
| <b>Sleep</b>                        |              |               | -0.52      | -0.80, -0.24  | -0.49      | -0.86, -0.12  | 2.54        | 1.40, 3.67    |
| <b>SED</b>                          | 0.51         | 0.23, 0.79    |            |               | 0.01       | -0.31, 0.33   | 3.04        | 1.94, 4.13    |
| <b>LPA</b>                          | 0.48         | 0.13, 0.83    | -0.05      | -0.36, 0.25   |            |               | 3.00        | 1.76, 4.24    |
| <b>MVPA</b>                         | -1.27        | -1.92, -0.62  | -1.80      | -2.40, -1.20  | -1.77      | -2.54, -1.01  |             |               |
| <b>Obese <i>n</i> = 78</b>          |              |               |            |               |            |               |             |               |
|                                     | <b>Sleep</b> |               | <b>SED</b> |               | <b>LPA</b> |               | <b>MVPA</b> |               |
|                                     | $\Delta'$    | <b>95% CI</b> | $\Delta'$  | <b>95% CI</b> | $\Delta'$  | <b>95% CI</b> | $\Delta'$   | <b>95% CI</b> |
| <b>Sleep</b>                        |              |               | -0.51      | -0.79, -0.24  | -0.50      | -0.85, -0.13  | 3.48        | 1.96, 5.00    |
| <b>SED</b>                          | 0.51         | 0.23, 0.79    |            |               | 0.01       | -0.30, 0.32   | 3.98        | 2.51, 5.45    |
| <b>LPA</b>                          | 0.48         | 0.13, 0.83    | -0.05      | -0.34, 0.25   |            |               | 3.95        | 2.33, 5.56    |
| <b>MVPA</b>                         | -1.49        | -2.23, -0.75  | -2.02      | -2.71, -1.33  | -1.20      | -2.85, -1.14  |             |               |

Abbreviations:  $\Delta'$ , estimated change in body fat%; CI, confidence interval; SED, sedentary time; LPA, light physical activity; MVPA, moderate-to-vigorous physical activity. Severe thinness and thinness weight status categories ( $n=11$ ) not presented. Note: Difference in body fat% is estimated for the reallocation of time from the behaviour in the column to the behaviour in the row, i.e., the first value of -0.52 in Row 1 is the estimated difference in body fat% for the reallocation of 30 minutes from sedentary time to sleep.

Analysis adjusted for parental education level and number of parents and siblings.
